# Supplementary material
Source: PubMed Central journal article supplement (PMC6439929)
Supplement: jamadermatol-155-307-s001.pdf [file jamadermatol-155-307-s001.pdf]

## Supplementary Online Content

Gao Y, Twigg AR, Hirose R, et al. Association of HLA antigen mismatch with risk of developing skin cancer after solid-organ transplant. *JAMA Dermatol*. Published online January 23, 2019. doi: 10.1001/jamadermatol.2018.4983

**eTable 1.** Standard Antigen Specificities and Broad Specificities

**eTable 2.** Cross-Reactive Group Antigen Specificities

This supplementary material has been provided by the authors to give readers additional information about their work.

**eTable 1.** Standard Antigen Specificities and Broad Specificities<sup>16</sup>

|        | Standard Antigen Specificities                                                         | Broad Specificities |
|--------|----------------------------------------------------------------------------------------|---------------------|
| HLA-A  |                                                                                        |                     |
|        | A1, A3, A11, A34, A36, A43, A80                                                        |                     |
|        | A2, A203                                                                               | A2                  |
|        | A23, A24, A2403                                                                        | A9                  |
|        | A25, A26, A34, A66                                                                     | A10                 |
|        | A19, A29, A30, A31, A32, A33, A74                                                      | A19                 |
|        | A68, A69                                                                               | A28                 |
| HLA-B  |                                                                                        |                     |
|        | B7, B8, B13, B18, B35, B37, B39, B41, B42, B46, B47, B48, B53, B59, B67, B73, B81, B82 |                     |
|        | B51, B52, B5102                                                                        | B5                  |
|        | B44, B45                                                                               | B12                 |
|        | B64, B65                                                                               | B14                 |
|        | B62, B63, B75, B76, B77, B78                                                           | B15                 |
|        | B38, B39                                                                               | B16                 |
|        | B57, B58                                                                               | B17                 |
|        | B49, B50, B4005                                                                        | B21                 |
|        | B54, B55, B56                                                                          | B22                 |
|        | B27, B2708                                                                             | B27                 |
|        | B60, B61                                                                               | B40                 |
|        | B71, B72                                                                               | B70                 |
| HLA-DR |                                                                                        |                     |
|        | DR4, DR7, DR8, DR9, DR10                                                               |                     |
|        | DR1, DR103                                                                             | DR1                 |
|        | DR15, DR16                                                                             | DR2                 |
|        | DR17, DR18                                                                             | DR3                 |
|        | DR11, DR12                                                                             | DR5                 |
|        | DR13, DR14, DR1403, DR1404                                                             | DR6                 |

**eTable 2.** Cross-Reactive Group Antigen Specificities<sup>19</sup>

| Cross-Reactive Group | Antigen Specificities                                                                                                                                                      |
|----------------------|----------------------------------------------------------------------------------------------------------------------------------------------------------------------------|
| 1C                   |                                                                                                                                                                            |
|                      | A1, A3, A11, A29, A30, A31, A36, A80                                                                                                                                       |
| 2C                   |                                                                                                                                                                            |
|                      | A2, A23, A24, A68, A69, B57, B58                                                                                                                                           |
| 4C                   |                                                                                                                                                                            |
|                      | A23, A24, A25, A32, B5, B5102, B13, B17, B27, B37, B38, B44, B47, B49, B51, B52, B53, B57, B58, B59, B63, B77                                                              |
| 5C                   |                                                                                                                                                                            |
|                      | B18, B35, B46, B49, B50, B51, B52, B53, B62, B63, B71, B72, B73, B75, B76, B77, B78                                                                                        |
| 6C                   |                                                                                                                                                                            |
|                      | B7, B8, B14, B18, B22, B2708, B35, B39, B40, B4005, B41, B42, B45, B46, B48, B50, B54, B55, B56, B60, B61, B62, B64, B65, B67, B70, B71, B72, B73, B75, B76, B78, B81, B82 |
| 7C                   |                                                                                                                                                                            |
|                      | B7, B8, B13, B27, B41, B42, B47, B48, B54, B55, B56, B59, B60, B61, B67, B81, B82                                                                                          |
| 8C                   |                                                                                                                                                                            |
|                      | B8, B18, B38, B39, B59, B64, B65, B67                                                                                                                                      |
| 10C                  |                                                                                                                                                                            |
|                      | A25, A26, A32, A33, A34, A43, A66, A74                                                                                                                                     |
| 12C                  |                                                                                                                                                                            |
|                      | B13, B37, B41, B44, B45, B47, B49, B50, B60, B61                                                                                                                           |
